# Supplementary material
Source: PubMed Central journal article supplement (PMC3404342)
Supplement: supp_en.2012-1059_EN-12-1059suppfigs2.pdf [file supp_en.2012-1059_EN-12-1059suppfigs2.pdf]

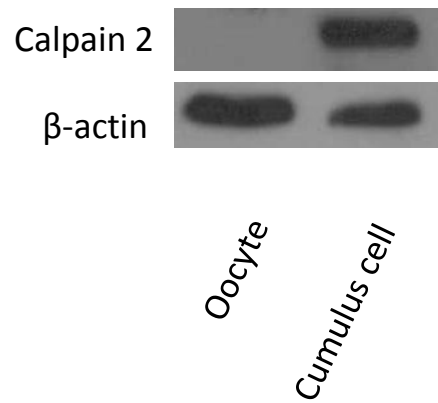

Supplemental figure 1. The protein levels of calpain 2 in oocytes or cumulus cells of COCs were recovered from eCG-primed mice, and then the oocytes were separated from cumulus cells and each used for immunoblot of calpain 2

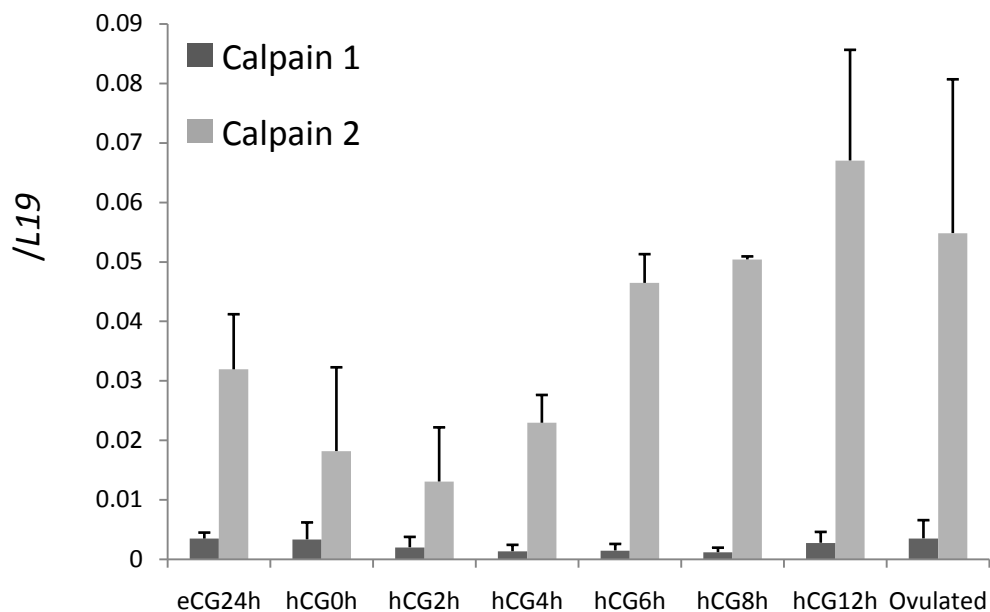

Supplemental figure 2. The expression levels of calpain 1 and calpain 2 mRNA in COCs recovered from eCG primed or eCG+hCG injected mice.

Total RNA was isolated using the RNeasy mini kit (QIAGEN, Valencia, CA) according to the manufacturer's instructions. Total RNA was reverse transcribed using 500 ng poly-dT and 200 U of M-MLV reverse transcriptase (Promega Corp., Madison, WI). Real-time PCR was performed using the Rotor-Gene 6000 thermocycler (QIAGEN).

The primers were designed using software Primer3, as described below;

Calpain 1: F:5'-ACGGGAAGCTGGTGTTCGTGC-3'

R:5'-TGCAGCCTCCCGAAAGAGCC-3'

Calpain 2: F:5'-GTGGAAACTCACCTTCGAACCCCA-3'

R:5'-TCTGCATCCTCTCCAGCCAGC-3'

L19: F:5'-GGCATAGGGAAGAGGAAGG-3'

R:5'-GGATGTGCTCCATGAGGATGC-3'

The relative levels of gene expression were calculated using Rotor-Gene 6.0 software and normalized to levels of ribosomal protein L19 mRNA.
